# Supplementary material
Source: Springer Nature journal article supplement (https://www.springermedizin.de/resource/supplementary/12943_2014_1357_MOESM4_ESM.pdf/9552774)

**A**

DuCaP

C kd

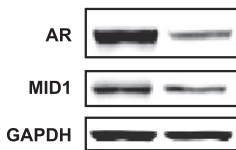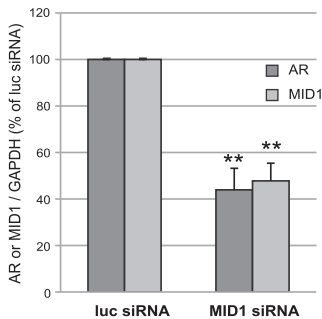

DuCaP

C kd

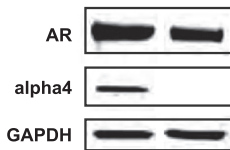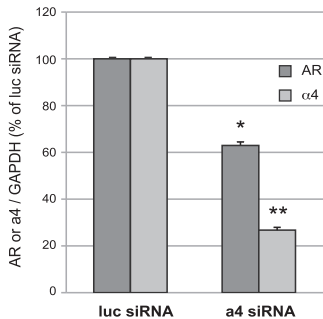**B**

LNCaP

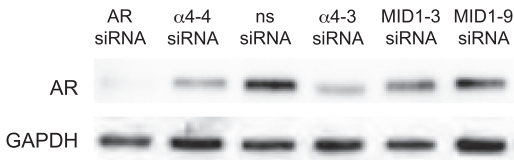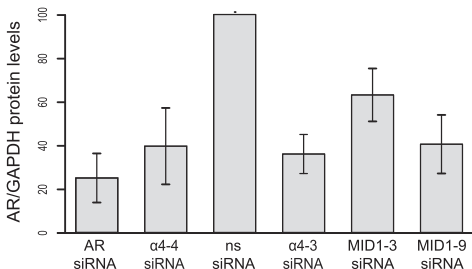

Supplement: MOESM4 [file 9552774]
